# Supplementary material for: Mechanism of Galectin-3 in arteriogenic erectile dysfunction via TLR4/MyD88/NF-κB pathway
Source: Research Square preprint supplement (doi:10.21203/rs.3.rs-3252839/v1), 2023-09-20
Supplement: Supplementary file 1 [file d9282fa4e2a638f77aa9e986.docx]

**Figure S1** Alterations in the structure and function of penile corpus cavernosum tissue.


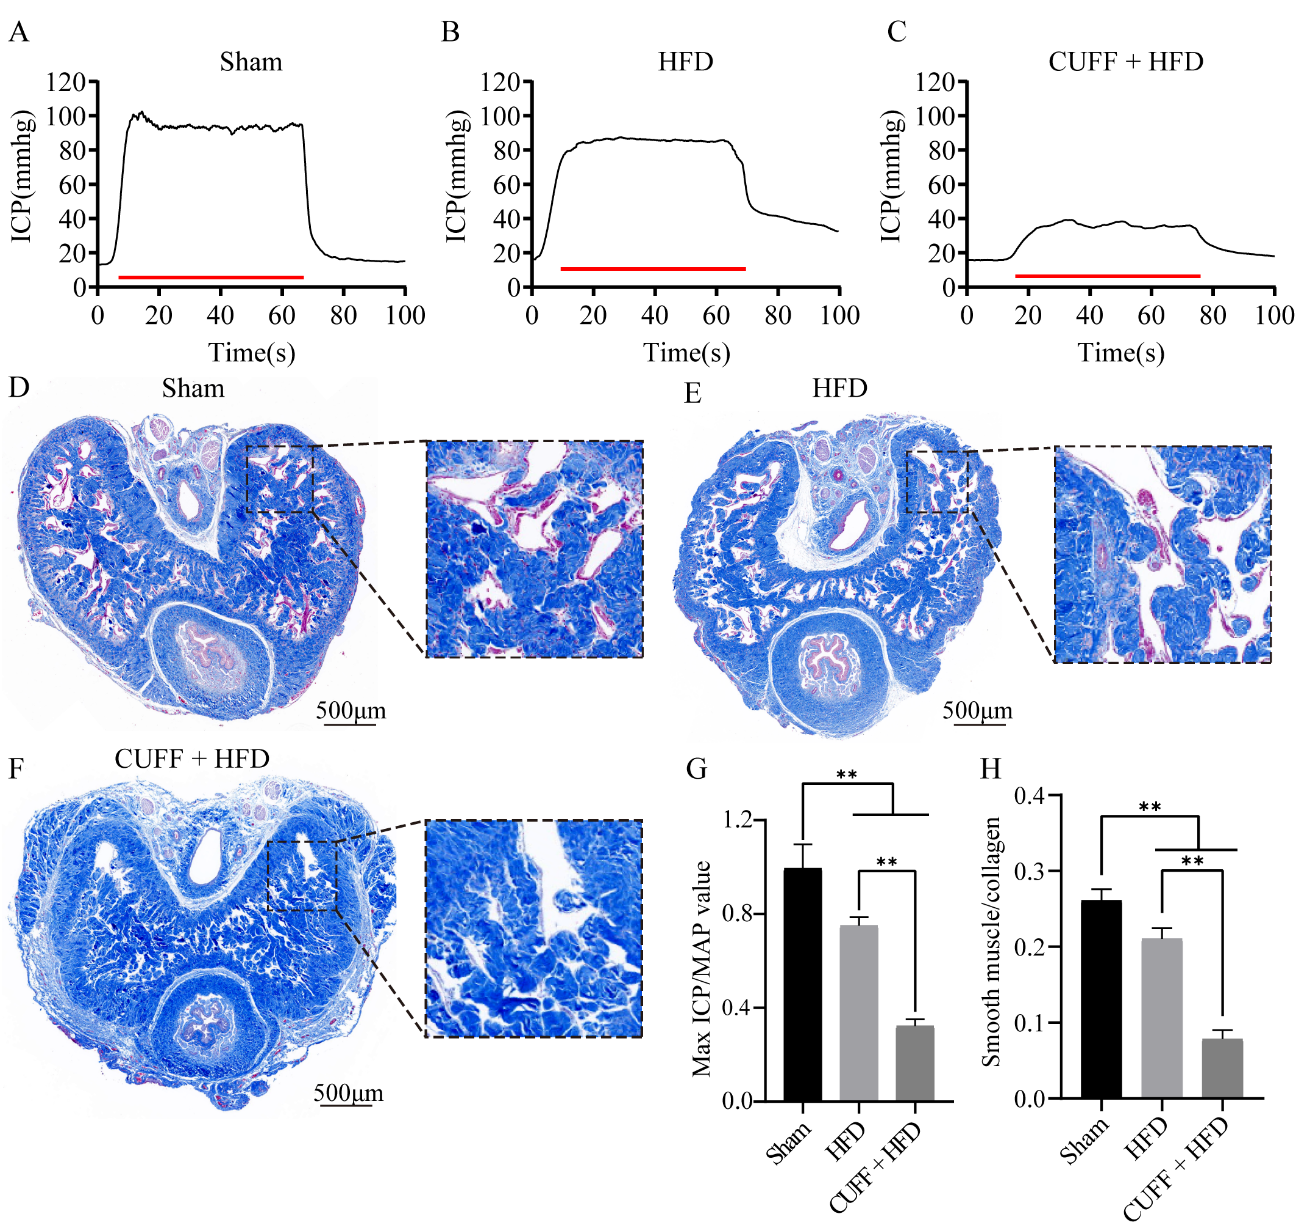


(A-C) ICP curves for each group after 12 weeks of modeling. The red line indicates 60 seconds of electrical stimulation of the cavernous nerve. (B-F) Masson's trichrome staining of various groups of penile tissue. Red is smooth muscle and blue is collagen. (G) Ratios of Max ICP to MAP (n=6). (H) The bars represent the ratio of smooth muscle to collagen (n=3). * p < 0.05, ** p < 0.01.
